# Supplementary material for: Evidence for karyoplasmic homeostasis during endoreduplication and a ploidy-dependent increase in gene transcription during tomato fruit growth
Source: Oxford University Press journal article supplement (doi:10.1242/dev.084053), 2012-09-18
Supplement: dev084053tables1.pdf [file dev084053tables1.pdf]

**Table S1. PCR primers used for the synthesis of tomato 5.8S RNA probes for RNA FISH**

| Gene                                  | Primer sequence (5'-3')                         |
|---------------------------------------|-------------------------------------------------|
| <b>Antisense probe</b>                |                                                 |
| Forward                               | <u>TAATACGACTCACTATAG</u> GGACAAACGACTCTCGGCAAC |
| Reverse                               | CGTGACGCCCAGGCAGACGTGCCCTCGGCCAAATGGCTTC        |
| <b>Sense probe (negative control)</b> |                                                 |
| Forward                               | ACAAACGACTCTCGGCAACGGATATCTCGGCTCTCGCAT         |
| Reverse                               | <u>TAATACGACTCACTATAG</u> GGAGGCAGACGTGCCCTCG   |

The sequence of the T7 promoter used for T7 RNA polymerase transcription is underlined.
