# Supplementary material for: Evidence for karyoplasmic homeostasis during endoreduplication and a ploidy-dependent increase in gene transcription during tomato fruit growth
Source: Oxford University Press journal article supplement (doi:10.1242/dev.084053), 2012-09-18
Supplement: dev084053tables2.pdf [file dev084053tables2.pdf]

**Table S2. Primers used in qPCR to amplify genomic DNA or cDNA and size of amplified products**

| Gene                                          | Primer sequence (5'-3') | Expected size (bp) | SGN gene ID / accession number |
|-----------------------------------------------|-------------------------|--------------------|--------------------------------|
| <b>Solly;WEE1</b>                             |                         |                    |                                |
| Sense                                         | CAAATTTGAAATCTCCCCAA    | 104                | Solyc09g074830 /               |
| Antisense                                     | TGGAAATGGATCTTCTTGTA    |                    | AM180939                       |
| <b>Solly;CCS52A</b>                           |                         |                    |                                |
| Sense                                         | AAACCCCATCAAGAACAAAT    | 102                | Solyc08g080080 /               |
| Antisense                                     | AAGATCTACTCGGAATGAAA    |                    | FN556057                       |
| <b>Solly;RPB1</b> (For genomic amplification) |                         |                    |                                |
| Sense                                         | ATAGCGTAAGTTAGCGACCTGAT | 105                | Solyc02g083350                 |
| Antisense                                     | TCAGAAAGGAGGCTTTAAGAA   |                    |                                |
| <b>Solly;RPB1</b> (For cDNA amplification)    |                         |                    |                                |
| Sense                                         | CTGTGGTGCACATTGAGCAT    | 105                | SGN-U586520                    |
| Antisense                                     | CACACTTCATCTTCCGATCAAT  |                    |                                |
| <b>Solly;CDKB2;1</b>                          |                         |                    |                                |
| Sense                                         | CACAAACACAGCGAGAGTGAA   | 95                 | Solyc04g082840 /               |
| Antisense                                     | CCAACCTTCTCCAGCTTCTC    |                    | AJ297917                       |
| <b>Solly;MIS12</b>                            |                         |                    |                                |
| Sense                                         | GGTGTTTCGATTCATTGAACCTA | 92                 | Solyc03g114520 /               |
| Antisense                                     | AGAAATCGAAAGCATCGTCA    |                    | SGN-U563789                    |
